# Supplementary material
Source: publisher site journal article supplement (https://www.dovepress.com/article/401910)
Supplement: Supplementary file 1 [file get_supplementary_file.php]

**Supplement Table 1 Results of Ridge Regression analysis**

|  | Regression coefficient | P-value |
| --- | --- | --- |
| constant | 21.72 (0.79) | 0.43 |
| age | 0.23 (1.75) | 0.09 |
| Glucose | 0.30 (0.69) | 0.50 |
| Total Cholesterol | 0.23 (0.26) | 0.80 |
| Triglyceride | -0.07 (-0.07) | 0.94 |
| Waist circumference | 0.12 (0.87) | 0.39 |
| Hip circumference | 0.04 (0.27) | 0.79 |
| Height | 0.03 (0.23) | 0.82 |
| Weight | 0.04 (0.38) | 0.70 |
| BMI | -0.52 (-2.28)* | 0.03* |
| FSH | 0.03 (0.84) | 0.41 |
| Estradiol | -0.08 (-1.43) | 0.16 |
| Testosterone | -0.67 (-1.12) | 0.27 |
| Estradiol/Testosterone | -0.01 (-0.13) | 0.90 |
| IL-6 | -0.05 (-0.37) | 0.71 |
| Leptin | 0.00 (0.57) | 0.57 |
| Adiponectin | 0.00 (0.19) | 0.85 |
| MCP-1 | 0.01 (0.63) | 0.53 |
| TNF-α | 0.04 (0.20) | 0.85 |
| Resistin | 0.00 (0.47) | 0.64 |
| IL-1β | -3.21 (-1.33) | 0.19 |
| PAI-1 | -0.00 (-0.03) | 0.98 |
| Adiponectin/Resistin | -0.03 (-0.05) | 0.96 |
| Adiponectin/Leptin | -0.01 (-1.59) | 0.12 |
| Visceral fat area/Total fat area | 0.51 (0.04) | 0.97 |
| Total fat area | -0.00 (-0.14) | 0.89 |
| Visceral fat area | 0.00 (0.03) | 0.97 |
| Subcutaneous fat area | -0.00 (-0.15) | 0.88 |
| Fat content of psoas major | 0.01 (0.06) | 0.95 |
| Fat content of erector | 0.21 (1.38) | 0.17 |
| Liver fat content | -0.12 (-0.60) | 0.55 |

The values in parentheses are Student t values. * p<0.05 in the results of Ridge Regression analysis.


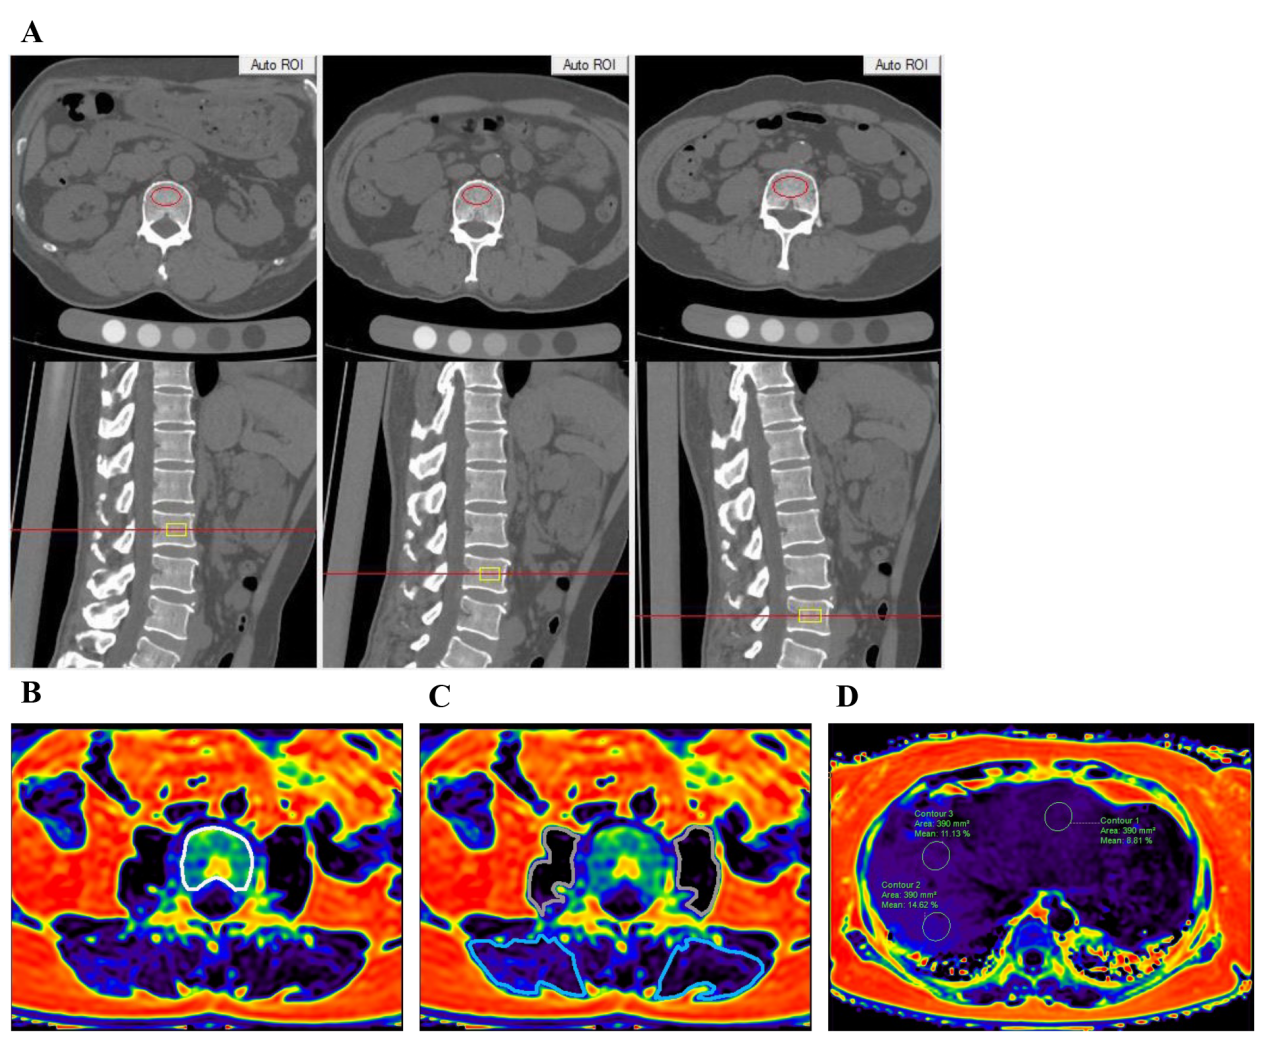


**Supplement Figure 1** **Imaging measurements by QCT and CSE-MRI**

1. **Images of Lumbar spine vBMD measurements by QCT.** ROI was placed in the mid-plane of L2, L3, and L4 vertebral bodies. The ROIs contained the largest areas of the trabecular bone, but did not include cortical bone or the basivertebral plexus.

**(B,C,D) Images of fat content measurements by CSE-MRI.** On the axial PDFF images, ROIs for marrow fat content measurement (white line) were drawn manually encompassing the largest region of the cancellous bone of vertebral bodies on central L2, L3, and L4 (**B**). Fat contents of bilateral psoas major (grey line) and erector muscle (blue line) were measured in the mid-plane of L3, ROIs were drawn manually along the visual edge of the muscles (**C**). ROIs for liver fat content measurement were placed manually in the center part of the left lobe, right-anterior lobe, and right-posterior lobe (**D**).


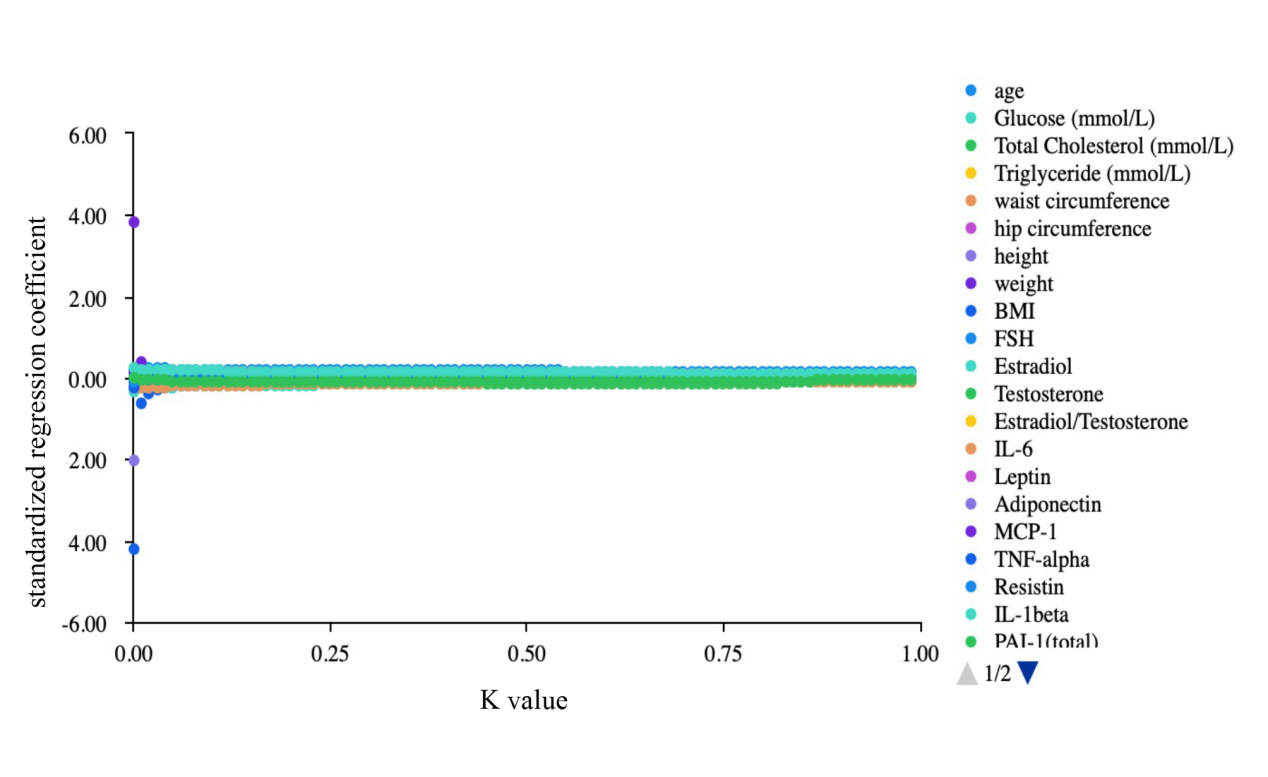
**Supplement Figure 2 Ridge trace map of ridge regression**
